# Supplementary material for: Choline metabolism reprogramming mediates an immunosuppressive microenvironment in non-small cell lung cancer (NSCLC) by promoting tumor-associated macrophage functional polarization and endothelial cell proliferation
Source: Springer Nature journal article supplement (doi:10.1186/s12967-024-05242-3), 2024-05-10

A

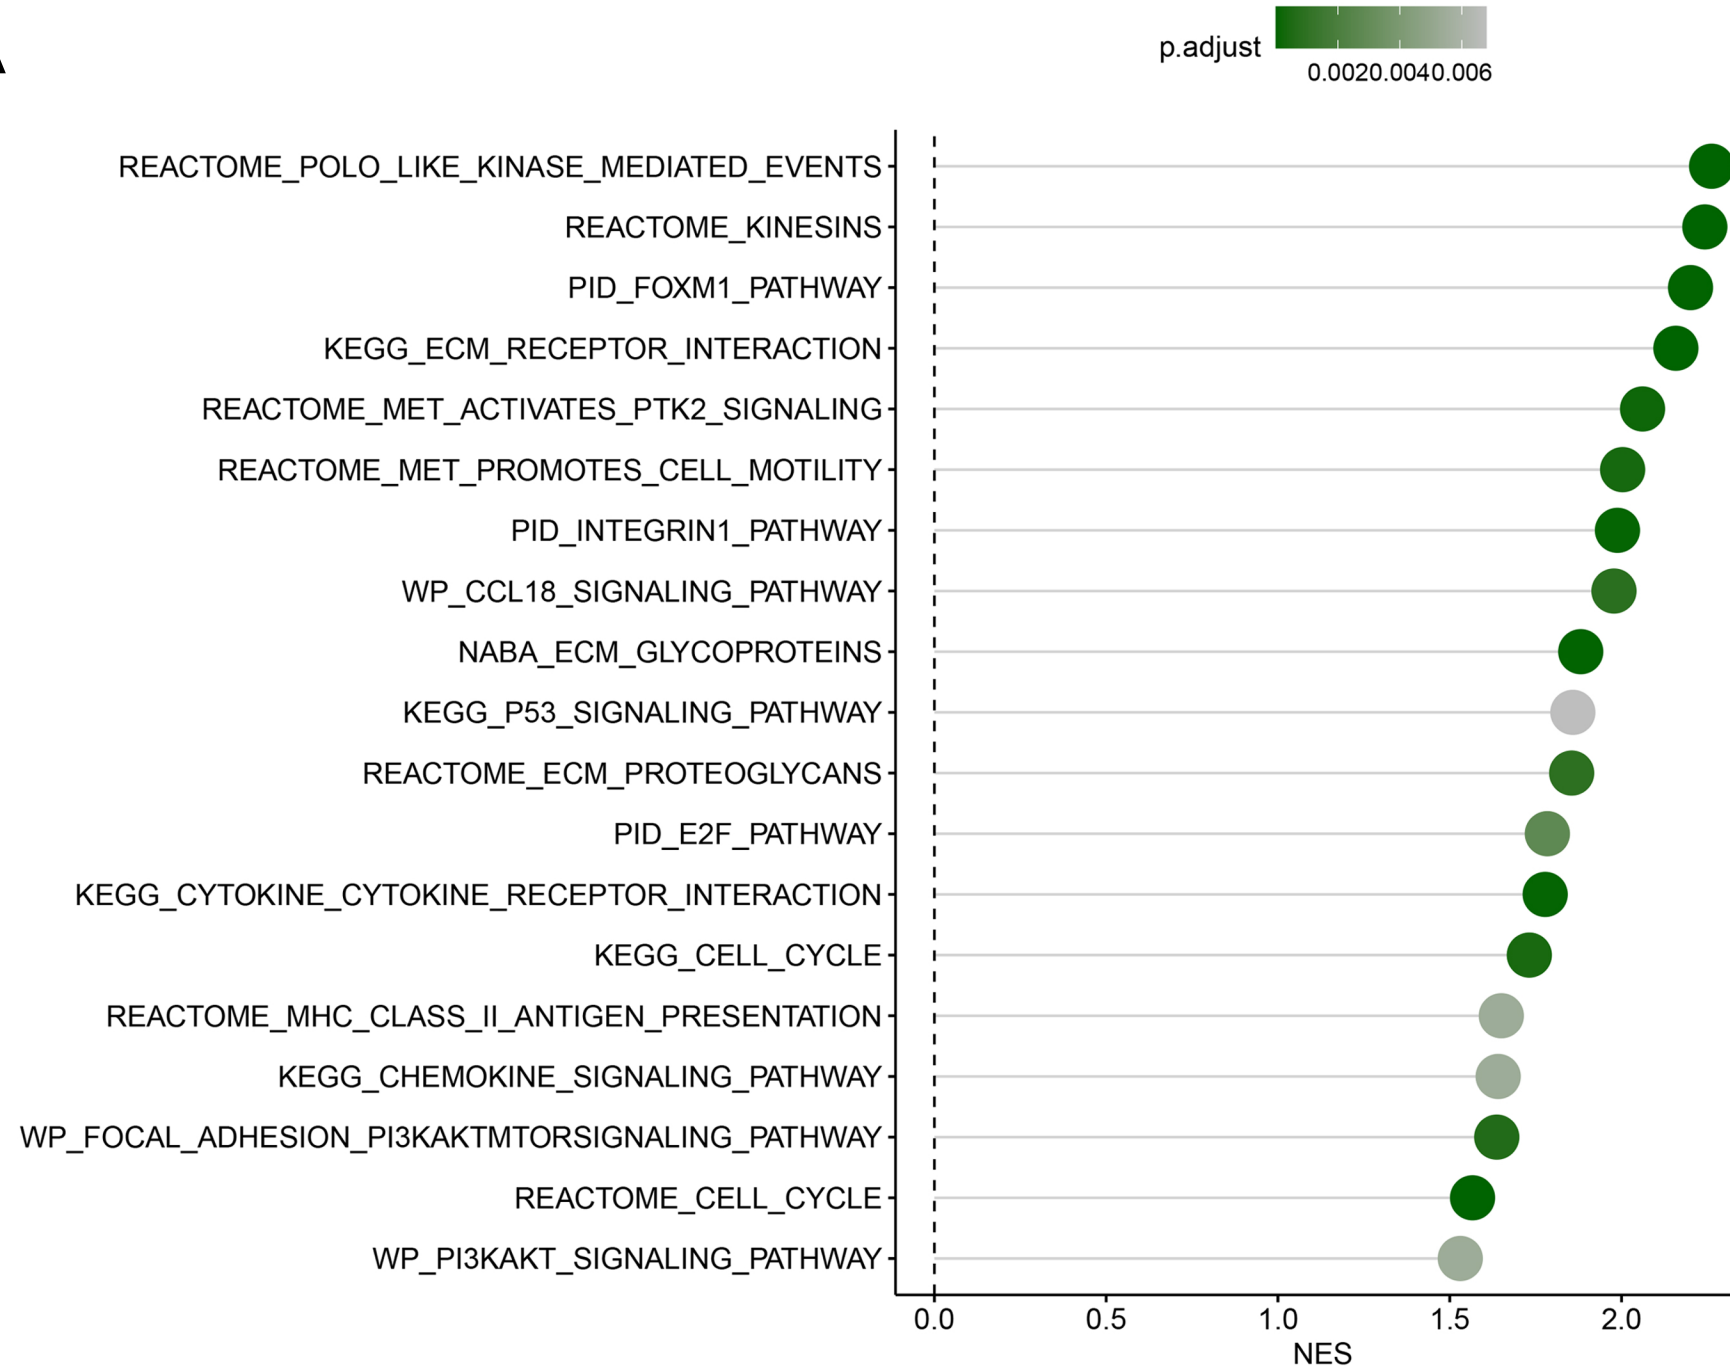

B

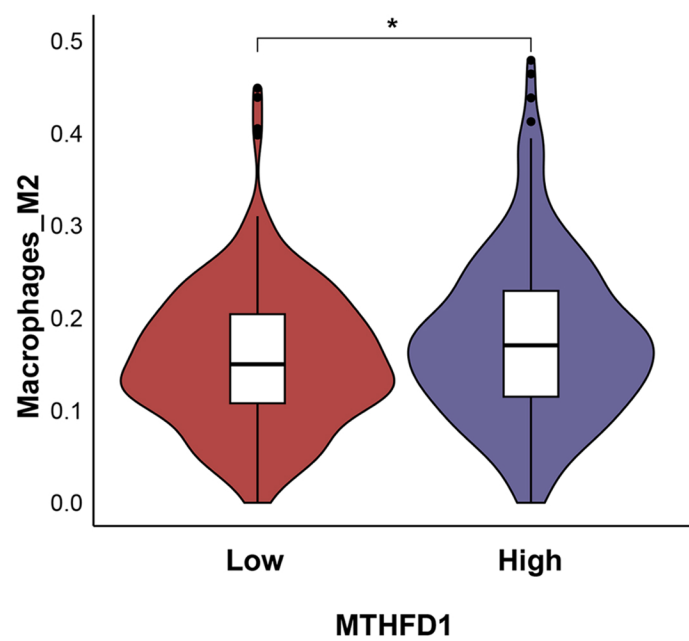

C

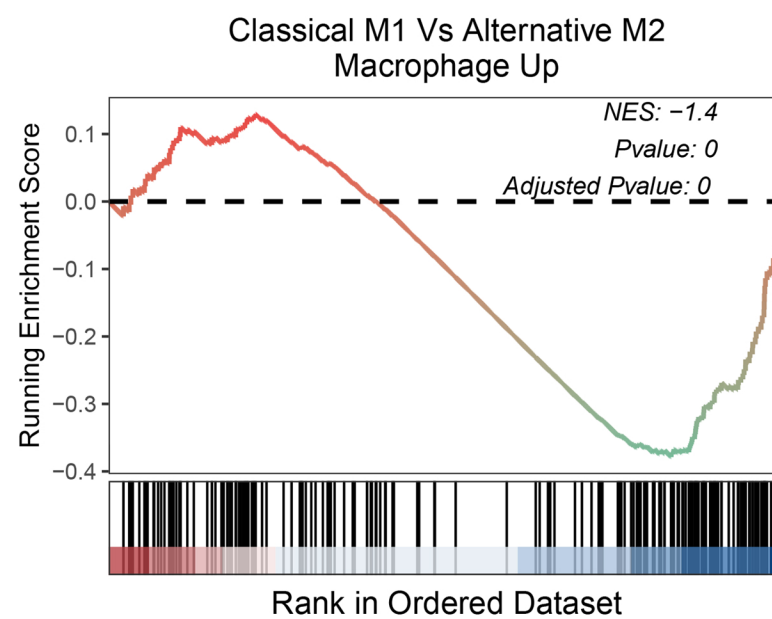

D

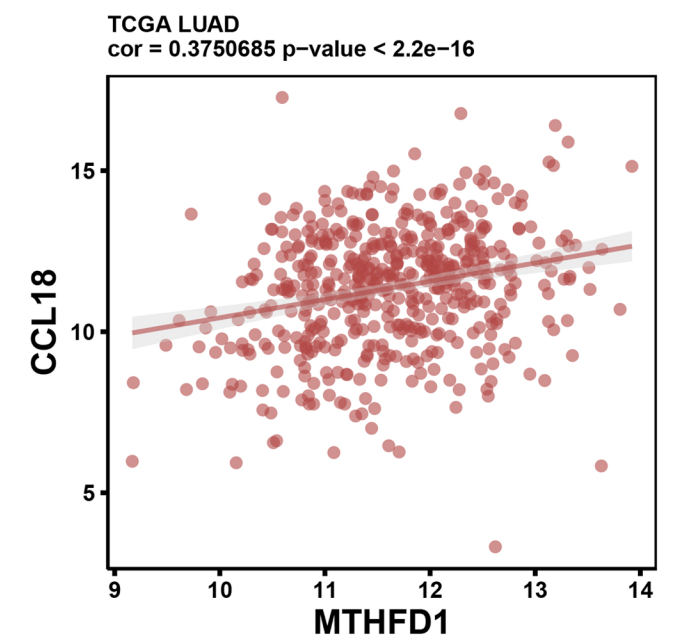

Supplement: MOESM3 [file 27076612]
